# Supplementary material for: Contrasting Biogeographic and Diversification Patterns in Two Mediterranean-Type Ecosystems
Source: PLoS One. 2012 Jun 20;7(6):e39377. doi: 10.1371/journal.pone.0039377 (PMC3379972; doi:10.1371/journal.pone.0039377)
Supplement: Table S2 — Voucher information and GenBank accession numbers for sequences used in this study. (XLS) [file pone.0039377.s006.xls]

## Sheet: Table_Taxa_FINAL3.csv
Taxa	Authority	Country	Voucher	Herbarium	matK	rbcL	trnLF region	Total
Albuca abyssinica	Jacq.	South Africa	Manning 2687	NBG	AM902391	AM902289	AM902341; AM902435	3
Albuca acuminata	Baker	South Africa	Manning 3036	NBG	AM902433	AM902339	AM902486	3
Albuca amboensis	(Schinz) Oberm.	Botswana	Beaumont 568	NBG	AM902392	AM902290	AM90234; AM902436	3
Albuca amoena	(Batt.) J.C.Manning & Goldblatt	-	-	-	-	JX090405	JX090484	2
Albuca canadensis	(L.) F.M.Leight.	South Africa	Manning 3037	NBG	AM902432	AM902338	AM902485	3
Albuca clanwilliamae-gloria	U.Môll.-Doblies	South Africa	Manning 2561b	NBG	JX090312	AM902291	AM902343; AM902437	3
Albuca concordiana	Baker	South Africa	Goldblatt, Manning & Savolainen 11527	MO	AM902397	AM902296	AM902348; AM902442	3
Albuca consanguinea	(Kunth) J.C.Manning & Goldblatt	-	-	-	JX090313	JX090406	JX090485	3
Albuca cooperi	Baker	South Africa	Chase 24814	K	-	JX090407	JX090486	2
Albuca etesiogaripensis	U.Môll.-Doblies	Namibia	Goldblatt & Manning 11352	NBG	AM902412	AM902311	AM902363; AM902458	3
Albuca fragrans	Jacq.	South Africa	Manning 2184	NBG	-	JX090408	JX090487	2
Albuca glandulosa	Baker	-	-	-	-	JX090409	JX090488	2
Albuca longibracteata	Engl.	ex hort. Kew, 1994-2325	Chase 1507	K	AM902413	AM902312	AM902364; AM902459	3
Albuca nelsonii	N.E.Br.	cult. Vienna	Pfosser H062	-	-	-	AJ232468; AJ232591	1
Albuca pendula	B.Mathew	Saudi Arabia	Chase 1776	K	JX090314	JX090410	JX090489	3
Albuca pulchra	(Schinz) J.C.Manning & Goldblatt	Namibia	Mannheimer CM2506	NBG	AM902417	AM902317	AM902369; AM902464	3
Albuca rupestris	Hilliard & B.L.Burtt	South Africa	-	-	-	JX090411	JX090490	2
Albuca secunda	(Jacq.) J.C.Manning & Goldblatt	South Africa	MartÍnez-AzorÍn	-	AM992674	AM992647	AM992644	3
Albuca seineri	(Engl. & K.Krause) J.C.Manning & Goldblatt	South Africa	Snijman s.n.	-	-	AM902314	AM902366; AM902461	2
Albuca semipedalis	Baker	South Africa	Goldblatt, Manning & Savolainen 11510	NBG	JX090392	JX090468	JX090575	3
Albuca setosa	Jacq.	South Africa	Manning 2689	NBG	AM902393	AM902292	AM902344; AM902438	3
Albuca shawii	Baker	South Africa	Chase 1012	K	AM902394	AM902293	AM902345; AM902439	3
Albuca stapfii	(Schinz) J.C.Manning & Goldblatt	Namibia	Mannheimer 1747	WIND	AM902415	AM902315	AM902367; AM902462	3
Albuca suaveolens	(Jacq.) J.C.Manning & Goldblatt	South Africa	Goldblatt, Manning & Savolainen 11493	MO	AM902396	AM902295	AM902347; AM902441	3
Albuca tenuifolia	Baker	South Africa	Manning 2667	NBG	AM902418	AM902318	AM902370; AM902465	3
Albuca tortuosa	Baker	South Africa	Chase 1736	K	AM902395	AM902294	AM902346; AM902440	3
Albuca unifolia	(Retz.) J.C.Manning & Goldblatt	South Africa	Manning 2270b	NBG	AM902419	AM902319	AM902371; AM902466	3
Albuca volubilis	(H.Perrier) J.C.Manning & Goldblatt	Madagascar	-	-	-	-	AM909699	1
Alrawia bellii	(Baker) Perss. & Wendelbo	Iran	Chase 1510	K	JX090315	AM902332	AM902384; AM902479	3
Barnardia japonica	(Thunb.) Schult. & Schult.f.	Japan	Pfosser H638	-	-	D28161	AJ507999	2
Bellevalia dubia	(Guss.) Roem. & Schult.	Greece	Chase 1679	K	JX090317	JX090413	JX090491	3
Bellevalia flexuosa	Boiss.	Lebanon	Chase 1680	K	-	JX090414	JX090492	2
Bellevalia fominii	Woronow	Turkey	Chase 1727	K	JX090318	JX090415	JX090493	3
Bellevalia glauca	(Lindl.) Kunth	Iran	Chase 1607	K	JX090319	JX090416	JX090494	3
Bellevalia longistyla	(Miscz.) Grossh.	Turkey	Chase 1611	K	JX090320	JX090417	JX090495	3
Bellevalia macrobotrys	Boiss.	Turkey	Chase 37386	K	-	-	JX090496	1
Bellevalia romana	(L.) Sweet	Greece	Chase 1732	K	JX090321	JX090418	JX090497	3
Bellevalia saviczii	Woronow	Afghanistan	Chase 1681	K	JX090322	JX090419	JX090498	3
Bellevalia sessiliflora	(Viv.) Kunth	-	Chase 37387	K	JX090323	-	JX090499	2
Bellevalia trifoliata	(Ten.) Kunth	Greece	Speta H052	-	-	-	AJ232548; AJ232671	1
Bowiea volubilis	Harv.	South Africa	Chase 176 NCU	K	JX090325	JX090421	JX090500	3
Brimeura amethystina	(L.) Chouard.	Spain	Chase 1777	K	JX090326	JX090422	JX090501	3
Daubenya aurea	Lindl.	South Africa	Chase 13057	K	JX090329	-	JX090504	2
Daubenya capensis	(Schltr.) A.M.van der Merwe & J.C.Manning	South Africa	Wetschnig 1129	-	-	-	AJ507955	1
Daubenya comata	(Burch. ex Baker) J.C.Manning & A.M.van der Merwe	-	Manning 2327	NBG	JX090330	JX090425	JX090505	3
Daubenya marginata	(Willd. ex Kunth) J.C.Manning & A.M.van der Merwe	South Africa	Manning 2343	NBG	JX090331	JX090426	JX090506	3
Daubenya namaquensis	(Schltr.) J.C.Manning & Goldblatt	South Africa	Chase 1723	K	JX090332	JX090427	JX090507	3
Daubenya stylosa	(W.H.Baker) A.M.van der Merwe & J.C.Manning	South Africa	JOHM 1043 24/84	NBG	JX090333	JX090428	JX090508	3
Daubenya zeyheri	(Kunth) J.C.Manning & A.M.van der Merwe	-	-	-	JX090334	-	JX090509	2
Dipcadi brevifolium	(Thunb.) Fourc.	Madagascar	Tait ALL182	-	AM902405	-	AM902450	3
Dipcadi concanense	(Dalzell) Baker	India	Yadav s.n.	-	JX090335	-	JX090510	2
Dipcadi erythraeum	Webb & Berthel.	India	Yadav s.n.	-	JX090336	-	JX090511	2
Dipcadi filifolium	Baker	Yemen	J.R.I. Wood 2811 sub Chase 1783	K	AM902404	AM902303	AM902355; AM902449	3
Dipcadi glaucum	(Burch. ex Ker Gawl.) Baker	South Africa	Manning 2237	NBG	AM902402	AM902301	AM902353; AM902447	3
Dipcadi goaense	Prabhug., U.S.Yadav & Janarth.	India	Yadav s.n.	-	JX090337	-	JX090512	2
Dipcadi gracillimum	Baker	South Africa	Manning 2682	NBG	AM902399	AM902298	AM902350; AM902444	3
Dipcadi heterocuspe	Baker	-	MP H603	-	-	-	AJ507926	1
Dipcadi longifolium	(Lindl.) Baker	Malawi	Chase 16972	K	AM902403	AM902302	AM902354; AM902448	3
Dipcadi montanum	(Dalzell) Baker	India	Yadav s.n.	-	JX090338	-	JX090513	2
Dipcadi saxorum	Blatt.	India	Yadav s.n.	-	JX090339	-	JX090514	2
Dipcadi serotinum	(L.) Medik.	India	Yadav s.n.	-	JX090340	JX090429	JX090515	3
Dipcadi ursulae	Blatt.	India	Yadav s.n.	-	JX090341	-	JX090516	2
Drimia altissima	(L.f.) Ker Gawl.	Tanzania	Chase 1870	K	JX090342	JX090430	JX090517	3
Drimia anomala	(Baker) Baker	South Africa	McmAsters s.n.	NBG	JX090343	-	JX090518	2
Drimia aphylla	(Forssk.) J.C.Manning & Goldblatt	Jordan	Strauss H878	-	-	-	AJ426113	1
Drimia calcarata	(Baker) Stedje	South Africa	Manning 3152	NBG	JX090344	-	JX090519	2
Drimia capensis	(Burm.f.) Wijnands	South Africa	Manning s.n.	NBG	JX090345	JX090431	JX090520	3
Drimia convallarioides	(L.f.) J.C.Manning & Goldblatt	South Africa	Goldblatt 10852 A	-	JX090346	JX090432	-	2
Drimia cryptopoda	(Baker) Pfosser	-	Sieder 53191	LI	-	-	AM410914	1
Drimia delagoensis	(Baker) Jessop	South Africa	Living collection	NBG	JX090347	JX090433	JX090521	3
Drimia dregei	(Baker) J.C.Manning & Goldblatt	South Africa	Goldblatt & Manning 11258	NBG	JX090348	JX090434	JX090522	3
Drimia elata	Jacq.	South Africa	UCI 007244	-	JX090349	AM234987	JX090523	3
Drimia exuviata	(Jacq.) Jessop	South Africa	Manning 1020	NBG	JX090350	JX090435	JX090524	3
Drimia filifolia	(Poir.) J.C.Manning & Goldblatt	South Africa	Manning ?	-	JX090351	JX090436	JX090525	3
Drimia fugax	(Moris) Stearn	-	Nordal 2517	Oslo	-	-	AJ247499; AJ247498	1
Drimia haworthioides	Baker	South Africa	Manning s.n.	NBG	JX090352	JX090437	JX090526	3
Drimia hesperantha	J.C.Manning & Goldblatt	South Africa	Gobblatt & Manning 10852	MO	JX090353	JX090438	JX090527	3
Drimia hesperia	(Webb & Berthel.) J.C.Manning & Goldblatt	Spain	Skala H069	-	-	-	AJ232465; AJ232588	1
Drimia indica	(Roxb.) Jessop	India	Yadav s.n.	-	-	-	JX090528	1
Drimia macrocarpa	Stedje	-	Nordal 2253	Oslo	-	-	AJ247505; AJ247504	1
Drimia macrocentra	(Baker) Jessop	South Africa	-	-	JX090354	JX090439	JX090529	3
Drimia maritima	(L.) Stearn	-	H321	-	-	-	AJ426138	1
Drimia mascarenensis	(Baker) J.C.Manning & Goldblatt	Madagascar	Pfosser H610	-	-	-	AJ507923	1
Drimia multisetosa	(Baker) Jessop	-	Stedje 94/57	Oslo	-	-	AJ247509; AJ247508	1
Drimia namibensis	(Oberm.) J.C.Manning & Goldblatt	-	-	NBG	JX090355	-	JX090530	2
Drimia nana	(Snijman) J.C.Manning & Goldblatt	South Africa	Saunders s.n.	NBG	JX090356	JX090440	JX090531	3
Drimia noctiflora	(Batt. & Trab.) Stearn	-	Pfosser M058	LI	-	-	AM410912	1
Drimia numidica	(Jord. & Fourr.) J.C.Manning & Goldblatt	-	H870	-	-	-	AJ426136	1
Drimia pancration	(Steinh.) J.C.Manning & Goldblatt	-	H769	-	-	-	AJ426101	1
Drimia polyantha	(Blatt. & McCann) Stearn	India	Yadav s.n.	-	-	-	JX090532	1
Drimia pumila	ined.	Guinea	Ebert & Bangoura H406	-	-	-	AJ232579; AJ232456	1
Drimia razii	Ansari	India	Yadav s.n.	-	-	-	JX090533	1
Drimia sanguinea	(Schinz) Jessop	-	Speta H932	LI	-	-	AM410905	1
Drimia sphaerocephala	Baker	South Africa	Manning 3151	NBG	JX090357	-	JX090534	2
Drimia undata	Stearn	-	H721	-	-	-	AJ426082	1
Drimia uniflora	J.C.Manning & Goldblatt	South Africa	Van Jaarsveld & Goldblatt 80865 A	NBG	-	-	JX090535	1
Drimia urgineoides	(Baker) J.C.Manning & Goldblatt	-	Pfosser H831	LI	-	-	AM410915	1
Drimia wightii	Lakshmin.	India	Yadav s.n.	-	-	-	JX090536	1
Drimiopsis barteri	Baker	-	A. Bjornstad	-	-	-	Z99138; Z99137	1
Drimiopsis botryoides	Baker	-	Nordal 1600	-	-	-	Z99140; Z99139	1
Drimiopsis burkei	Baker	-	-	-	-	-	DQ313326	1
Drimiopsis maculata	Lindl. & Paxton	South Africa	Chase 1822	K	JX090358	JX090441	JX090537	3
Drimiopsis pusilla	U.Môll.-Doblies & D.Môll.-Doblies	-	Lebatha 078	PUC	-	-	DQ313328	1
Eucomis bicolor	Baker	South Africa	Schnabel M162	-	-	-	AJ507933	1
Eucomis comosa	(Houtt.) Wehrh.	-	Septa H221	LI	-	-	AJ232623; AJ232500	1
Eucomis montana	Compton	South Africa	Schnabel M130	-	-	-	AJ507932	1
Eucomis vandermerwei	Verd.	South Africa	Wetschnig 2171	-	-	-	AJ507935	1
Eucomis zambesiaca	Baker	-	Chase 613	K	JX090359	JX090442	JX090538	3
Fessia greilhuberi	(Speta) Speta	-	Pfosser H013	-	-	-	AJ232657; AJ232534	1
Fessia hohenackeri	(Fisch. & C.A.Mey.) Speta	Spain	Mario MartÍnez & Julio Pati_o S09	-	JX090360	JX090443	JX090539	3
Fessia puschkinioides	(Regel) Speta	Tadzhikistan	Fritsch H211	-	-	-	AJ232659; AJ232536	1
Fessia vvedenskyi	(Pazij) Speta	Tadzhikistan	Chase 1688	K	JX090361	JX090444	JX090540	3
Fusifilum physodes	(Jacq.) Raf. ex Speta	Namibia	Nicolson s.n.	NBG	JX090362	-	JX090541	2
Hyacinthella dalmatica	Chouard	Croatia	Chase 21825	K	JX090365	JX090446	JX090544	3
Hyacinthella heldreichii	(Boiss.) Chouard	Turkey	Chase 1571	K	JX090366	JX090447	JX090545	3
Hyacinthella leucophaea	(K.Koch) Schur	Greece	Chase 21558	K	JX090367	JX090448	JX090546	3
Hyacinthella millingenii	(Post) Feinbrun	-	Chase s.n.	K	JX090368	-	JX090547	2
Hyacinthella nervosa	(Bertol.) Chouard	Turkey	Chase 21826	K	JX090369	JX090449	JX090548	3
Hyacinthoides aristidis	(Coss.) Rothm.	Algeria	Schneider H065	-	-	-	AJ232644; AJ232521	1
Hyacinthoides hispanica	(Mill.) Rothm.	Spain	Chase 16564	K	JX090370	JX090450	JX090549	3
Hyacinthoides italica	(L.) Rothm.	France	Pfosser H300	-	-	-	AJ232642; AJ232519	1
Hyacinthoides lingulata	(Poir.) Rothm.	Tunisia	Koenen H066	-	-	-	AJ232643; AJ232520	1
Hyacinthoides mauritanica	(Schousb.) Speta	Portugal	BB-184-01	-	-	-	FJ423239	1
Hyacinthoides non scripta	(L.) Chouard ex Rothm.	England	Fay, M.F. MFF108	K	JX090371	FJ395578	JX090550	3
Hyacinthoides paivae	S.Ortiz & Rodr.Oubi_a	Spain	MAF150573	-	-	-	FJ423275	1
Hyacinthoides reverchonii	(Degen & Hervier) Speta	Spain	Voglmayr H307	-	-	-	AJ232646; AJ232523	1
Hyacinthus litwinovii	Czerniak.	Iran	Akhani H573	-	-	-	AJ508689	1
Hyacinthus orientalis	L.	England	Crawley, M.J. MJC11	-	JX090372	AF116995	JX090551	3
Lachenalia aloides	(L.f.) Engl.	South Africa	Chase 18956	K	JX090373	JX090451	JX090552	3
Lachenalia contaminata	Aiton	South Africa	Pfosser M141	-	-	-	AJ507985	1
Lachenalia ensifolia	(Thunb.) J.C.Manning & Goldblatt	South Africa	Chase 2258	K	JX090374	-	JX090553	2
Lachenalia namibiensis	W.F.Barker	Namibia	Muller-Doblies H059	-	-	-	AJ232628; AJ232505	1
Lachenalia pallida	Aiton	South Africa	Wetschnig 1168	-	-	-	AJ507981	1
Lachenalia paucifolia	(W.F.Barker) J.C.Manning & Goldblatt	South Africa	Wetschnig 1154	-	-	-	AJ507990	1
Lachenalia pusilla	Jacq.	South Africa	Manning s.n.	NBG	JX090375	JX090452	JX090554	3
Lachenalia rubida	Jacq.	South Africa	Pfosser M140	-	-	-	AJ507983	1
Ledebouria concolor	(Baker) Jessop	South Africa	Wetschnig 1412	-	-	-	AJ507946	1
Ledebouria cordifolia	(Baker) Stedje & Thulin	Malawi	Nordal & Stedje 2409	-	-	-	Z99144; Z99143	1
Ledebouria floribunda	(Baker) Jessop	South Africa	Wetschnig 1433	-	-	-	AJ507937	1
Ledebouria nossibeensis	(H.Perrier) J.C.Manning & Goldblatt	Madagascar	MP53990	-	JX090376	JX090453	AM909711	3
Ledebouria revoluta	(L.f.) Jessop	India	Yadav s.n.	-	JX090377	-	JX090555	2
Ledebouria socialis	(Baker) Jessop	South Africa	Chase 1850	K	JX090378	L05038	JX090556	3
Ledebouria somaliensis	(Baker) Stedje & Thulin	Ethiopia	Nordal 2296	-	-	-	Z99150; Z99151	1
Ledebouria urceolata	Stedje	Ethiopia	Nordal 2297	-	-	-	Z99148; Z99149	1
Leopoldia caucasica	(Griseb.) Losinsk.	Turkey	Chase 3533	K	-	JX090454	JX090557	2
Leopoldia comosa	(L.) Parl.	Italy	Neuner H056	-	-	AY149378	AJ232669; AJ232546	2
Leopoldia longipes	(Boiss.) Losinsk.	Turkey	Chase 3535	K	-	JX090455	JX090558	2
Leopoldia tenuiflora	(Tausch) Heldr.	Turkey	Chase 1849	K	-	-	JX090559	1
Massonia bifolia	(Jacq.) J.C.Manning & Goldblatt	South Africa	Wetschnig 1130	-	-	Z77279	AJ507966	2
Massonia depressa	Houtt.	South Africa	Wetschnig 1140	-	-	-	AJ507972	1
Massonia echinata	L.f.	South Africa	Manning 2156	NBG	JX090379	JX090456	JX090560	3
Massonia pustulata	Jacq.	South Africa	Wetschnig 1148	-	-	-	AJ507970	1
Massonia pygmaea	Schltdl. ex Kunth	South Africa	Wetschnig 1161	-	-	-	AJ507967	1
Massonia tenella	Sol. ex Baker	South Africa	Wetschnig 1145	-	-	-	AJ507976	1
Merwilla lazulina	(Wild) Speta	Zimbabwe	Nordal 2491	-	-	-	Z99156; Z99155	1
Muscari armeniacum	Leichtlin ex Baker	Turkey	Chase 3536	K	-	JX090458	JX090561	2
Muscari botryoides	(L.) Mill.	Austria	Kleesald H011	-	-	-	AJ232668; AJ232545	1
Muscari macrocarpum	Sweet	Turkey	Fritsch H212	-	-	-	AJ232667; AJ232544	1
Muscari neglectum	Guss. ex Ten.	Turkey	Chase 21836	K	JX090381	Z77278	JX090562	3
Muscari parviflorum	Desf.	Syria	Plass M138	-	-	-	AJ508003	1
Namophila urotepala	U.Môll.-Doblies & D.Môll.-Doblies	South Africa	Goldblatt & Manning 4	NBG	JX090382	JX090459	JX090563	3
Ornithogalum amphibolum	Zahar.	Romania	Speta H173	-	-	-	AJ232493; AJ232616	1
Ornithogalum arabicum	L.	Spain	MartÍnez-AzorÍn	-	AM992667	AM992653	AM992638	3
Ornithogalum armeniacum	Baker	Turkey	Chase 1682	K	AM992665	AM992654	AM992636	3
Ornithogalum baeticum	Boiss.	Spain	MartÍnez-AzorÍn	-	AM992668	AM992652	AM992639	3
Ornithogalum bicornutum	F.M.Leight.	South Africa	Goldblatt & Manning 11503	NBG	AM902420	AM902320	AM902372; AM902467	3
Ornithogalum boucheanum	(Kunth) Asch.	Spain	Mario MartÍnez & Julio Pati_o S09	-	JX090383	-	JX090564	2
Ornithogalum broteroi	M.LaÍnz	Spain	MartÍnez-AzorÍn	-	AM992663	AM992656	AM992634	3
Ornithogalum candicans	(Baker) J.C.Manning & Goldblatt	ex hort. Kew 1969-19589	Chase 2024	K	AM902407	AM902305	AM902357; AM902452	3
Ornithogalum ceresianum	F.M.Leight.	South Africa	Martinez, M 1	-	-	JX090460	JX090565	2
Ornithogalum chionophilum	Holmboe	Cyprus	MartÍnez-AzorÍn	-	AM992670	AM992650	AM992641	3
Ornithogalum collinum collinum	Guss.	-	-	-	-	JX090461	JX090566	2
Ornithogalum concinnum	Salisb.	Spain	Martinez s.n.	-	-	-	AJ232604; AJ232481	1
Ornithogalum conicum	Jacq.	South Africa	Manning 2993	NBG	AM902423	AM902324	AM902376; AM902471	3
Ornithogalum constrictum	F.M.Leight.	South Africa	Manning s.n.	NBG	-	AM902325	AM902377; AM902472	2
Ornithogalum convallarioides	H.Perrier	Madagascar	Lavranos s.n.	NBG	AM902431	AM902337	AM902389; AM902484	3
Ornithogalum corticatum	Mart.-AzorÍn	South Africa	MartÍnez-AzorÍn & Manning 96	K	AM992659	JX090462	AM992630	3
Ornithogalum cuspidatum	Bertol.	-	Chase 28102	K	JX090384	-	JX090567	2
Ornithogalum divergens	Boreau	-	MP-M191	-	AM902430	-	AM909707	3
Ornithogalum dubium	Houtt.	South Africa	Manning & Snijman 2722	NBG	AM902424	AM902326	AM902378; AM902473	3
Ornithogalum esterhuyseniae	Oberm.	South Africa	Helme 2850	NBG	AM902416	AM902316	AM902368; AM902463	3
Ornithogalum filicaule	J.C.Manning & Goldblatt	South Africa	Goldblatt & Manning 11369	NBG	AM902410	AM902309	AM902361; AM902456	3
Ornithogalum fimbriatum	Willd.	Turkey	Chase 28104	K	JX090385	-	JX090568	2
Ornithogalum flexuosum	(Thunb.) U.Môll.-Doblies & D.Môll.-Doblies	South Africa	Manning NBG194584	NBG	-	AM902321	AM902373; AM902468	2
Ornithogalum gracillimum	K.Koch.	Kenya	MartÍnez-AzorÍn	K	JX090386	AM992651	AM992640	3
Ornithogalum graminifolium	Thunb.	South Africa	Manning 2695	NBG	AM902425	AM902327	AM902379; AM902474	3
Ornithogalum gussonei	Ten.	South Africa	-	NBG	JX090387	-	JX090569	2
Ornithogalum haalenbergense	U.Môll.-Doblies & D.Môll.-Doblies	-	-	-	JX090388	JX090463	JX090570	3
Ornithogalum hispidum	U.Môll.-Doblies & D.Môll.-Doblies	South Africa	Manning 2696	NBG	-	AM902328	AM902380; AM902475	2
Ornithogalum juncifolium	Jacq.	South Africa	Manning 2699	NBG	AM902421	AM902322	AM902374; AM902469	3
Ornithogalum lanceolatum	Labill.	-	Chase 20633	K	-	JX090464	JX090571	2
Ornithogalum maculatum	Jacq.	South Africa	Manning s.n.	NBG	AM902434	AM902340	AM902390; AM902487	3
Ornithogalum montanum	Cirillo in M.Tenore	Lebanon	Chase 1493	K	AM992661	AM992657	AM992632	3
Ornithogalum multifolium	Baker	South Africa	John Manning 2936	NBG	JX090389	JX090465	JX090572	3
Ornithogalum narbonense	L.	Spain	MartÍnez-AzorÍn	-	JX090390	AM992646	AM992645	3
Ornithogalum neopatersonia	J.C.Manning & Goldblatt	South Africa	Goldblatt & Manning 10723	MO	AM902411	AM902310	AM902362; AM902457	3
Ornithogalum nutans	L.	-	-	-	AM992660	AM992658	AM992631	3
Ornithogalum oligophyllum	E.D.Clarke	Greece	Chase 2810	K	-	JX090466	JX090573	2
Ornithogalum orthophyllum	Ten.	Greece	Chase 1823	K	JX090391	JX090467	JX090574	3
Ornithogalum paludosum	Baker	South Africa	Manning 3149	NBG	AM992671	AM992649	AM992642	3
Ornithogalum pascheanum	Speta	Turkey	Vasak H022	-	-	-	AJ232492; AJ232615	1
Ornithogalum pedicellare	Boiss. & Kotschy	Cyprus	MartÍnez-AzorÍn	-	AM992672	AM992648	AM992643	3
Ornithogalum princeps	(Baker) J.C.Manning & Goldblatt	South Africa	Pfosser H379	-	-	-	AJ232597; AJ232474	1
Ornithogalum pruinosum	F.M.Leight.	South Africa	Goldblatt, Manning & Savolainen 11526	NBG	AM902422	AM902323	AM902375; AM902470	3
Ornithogalum pyrenaicum	L.	Spain	MartÍnez-AzorÍn	-	AM992664	AM992655	AM992635	3
Ornithogalum refractum	Kit. ex Schltdl.	Macedonia	Chase 20632	K	-	JX090469	JX090576	2
Ornithogalum reverchoni	Lange	Spain	P.H. Davis Edin. No. 80905 sub Chase 1721	K	AM902427	AM902331	AM902383; AM902478	3
Ornithogalum rotatum	U.Môll.-Doblies & D.Môll.-Doblies	South Africa	Manning 2275	NBG	AM902414	AM902313	AM902365; AM902460	3
Ornithogalum rupestre	L.f.	South Africa	Manning s.n.	-	AM902429	AM902335	AM902387; AM902482	3
Ornithogalum sardienii	van Jaarsv.	South Africa	Van Jaarsveld, Evu & Kotze 10854	NBG	-	AM902329	AM902381; AM902476	2
Ornithogalum saundersiae	Baker	ex hort. Kew 1956-52405	Chase 1871	K	JX090393	AM902307	AM902359; AM902454	3
Ornithogalum sephtonii	Hilliard & B.L.Burtt	Lesotho	Snijman 2036	NBG	AM902430	AM902336	AM902388; AM902483	3
Ornithogalum sintenisii	Freyn.	Iran	Chase 20636	K	-	JX090470	JX090577	2
Ornithogalum umbellatum	L.	in culutre, London	A. Ortiz	-	-	-	JX090578	1
Ornithogalum viridiflorum	(I.Verd.) J.C.Manning & Goldblatt	Lesotho	Chase 17517	K	AM902408	AM902306	AM902358; AM902453	3
Ornithogalum wiedemannii	Boiss.	Turkey	Pasche H018	-	-	-	AJ232494; AJ232617	1
Ornithogalum xanthochlorum	Baker	South Africa	Goldblatt, Manning & Savolainen 11491	NBG	AM902409	AM902308	AM902360; AM902455	3
Oziroe acaulis	(Baker) Speta	Peru	Weigend s.n.	-	-	-	AJ507921	1
Oziroe biflora	(Ruiz & Pav.) Speta	Chile	Chase 793	K	-	Z69222	AJ232576; AJ232453	2
Prospero autumnale	(L.) Speta	-	Nordal 2519	-	-	-	X74581; Z99154	1
Prospero elisae	Speta	Greece	Speta H068	-	-	-	AJ232653; AJ232530	1
Prospero obtusifolium	(Poir.) Speta	Morocco	HC H053	-	-	-	AJ232652; AJ232529	1
Pseudogaltonia clavata	(Baker ex Mast.) E.Phillips	Namibia	Codd 5803 sub Chase 2255	K	AM902406	AM902304	AM902356; AM902451	3
Pseudomuscari chalusicum	(D.C.Stuart) Garbari	Iran	Chase 1569	K	JX090394	JX090471	JX090579	3
Pseudomuscari coeleste	(Fomin) Garbari	Turkey	Chase 1722	K	-	JX090472	JX090580	2
Pseudomuscari coeruleum	(Losinsk.) Garbari	-	Chase 37832	K	-	-	JX090581	1
Pseudomuscari forniculatum	(Fomin) Garbari	Turkey	Chase 1716	K	-	JX090473	JX090582	2
Pseudomuscari inconstrictum	(Rech.f.) Garbari	-	Chase s.n.	K	JX090395	JX090474	JX090583	3
Pseudomuscari pallens	(M.Bieb.) Garbari	Georgia	Chase 37835	K	JX090396	JX090475	JX090584	3
Pseudoprospero firmifolium	(Baker) Speta	South Africa	Manning 2701	NBG	-	AM902333	AM902385; AM902480	2
Puschkinia scilloides	Adams	Lebanon	Chase 21560	K	JX090397	JX090476	JX090585	3
Resnova humifusa	(Baker) U.Môll.-Doblies & D.Môll.-Doblies	-	-	NBG	JX090398	JX090477	JX090586	3
Resnova lachenalioides	(Baker) van der Merwe	-	P Lebatha 019	-	-	-	DQ313330	1
Resnova maxima	van der Merwe	-	P Lebatha 077	-	-	-	DQ313331	1
Schizobasis intricata	(Baker) Baker	-	Chase 1506	K	JX090399	JX090478	JX090587	3
Schizocarphus nervosus	(Burch.) van der Merwe	South Africa	Saunders M132	-	-	-	AJ507936	1
Scilla bifolia	L.	Turkey	Chase 1714	K	JX090400	JX090479	JX090588	3
Scilla bithynica	Boiss.	Bulgaria	Vasak H232	-	-	-	AJ232663; AJ232540	1
Scilla cydonia	Speta	Greece	Jahn & al. H215	-	-	-	AJ232672; AJ232549	1
Scilla dimartinoi	Brullo & Pavone	Italy	Vezda H178	-	-	-	AJ232637; AJ232514	1
Scilla forbesii	(Baker) Speta	cult. LI	Speta H010	-	-	-	AJ232674; AJ232551	1
Scilla haemorrhoidalis	Webb & Berthel.	Portugal	Scheiblreiter H016	-	-	-	AJ508001; AJ232665	1
Scilla hyacinthoides	L.	Portugal	Scheiblreiter H016	-	-	-	AJ232665; AJ232542	1
Scilla latifolia	Willd. ex Schult. & Schult.f.	Morocco	Ehrendorfer H015	-	-	-	AJ232640; AJ232517	1
Scilla lilio hyacinthus	L.	Spain	Hoog & Hoog H298	-	-	-	AJ232634; AJ232511	1
Scilla litardierei	Breistr.	Croatia	Pfosser H230	-	-	-	AJ232664; AJ232541	1
Scilla madeirensis	Menezes	Madeira	Chase 37839	K	JX090401	-	JX090589	2
Scilla messeniaca	Boiss.	Greece	Chase 1718	K	JX090402	JX090480	JX090590	3
Scilla monophyllos	Link	Spain	Raus H049	-	-	-	AJ508000	1
Scilla nana	(Schult. & Schult.f.) Speta	Greece	Speta H238	-	-	-	AJ232675; AJ232552	1
Scilla peruviana	L.	Tunisia	Chase 1619	K	AJ581423	JX090481	JX090591	3
Scilla verna	Huds.	England	Chase 8288	K	JX090403	JX090482	JX090592	3
Scilla villosa	Desf.	Tunisia	Gruber H217	-	-	-	AJ232638; AJ232515	1
Spetaea lachenaliiflora	Wetschnig & Pfosser	South Africa	Saunders M164	-	-	JX090483	AJ507954	2
Veltheimia bracteata	Harv. ex Baker	South Africa	Chase 1735	K	JX090404	AM234991	JX090593	3
Zagrosia persica	(Hausskn.) Speta	Turkey	Leep H440	-	-	-	AJ232660; AJ232537	1
Outgroups
Asparagus sp.	-	-	-	-	JX090316	JX090412	-	2
Bessera sp.	-	-	-	-	JX090324	JX090420	-	2
Camassia leichtlinii	(Baker) S.Watson	-	Chase 483	K	JX090327	JX090423	JX090502	3
Chlorogalum pomeridianum	(DC.) Kunth	USA	Chase 838	K	JX090328	JX090424	JX090503	3
Hastingsia serpentinicola	Becking	-	Hufford 817	-	JX090363	-	JX090542	2
Hesperocallis undulata	A.Gray	USA	Cranfill & Schmid	JEPS	JX090364	JX090445	JX090543	3
Milla sp.	-	-	-	-	JX090380	JX090457	-	2
